# Supplementary material for: The Use of Wooden Clubs and Throwing Sticks among Recent Foragers: Cross-Cultural Survey and Implications for Research on Prehistoric Weaponry
Source: PubMed Central journal article supplement (PMC10073058; doi:10.1007/s12110-023-09445-3), 2023-03-29

## Supplementary Information

Article: **The Use of Wooden Clubs and Throwing Sticks among Recent Foragers: Cross-Cultural Survey and Implications for Research on Prehistoric Weaponry**

Author: Václav Hrnčír<sup>1,2</sup>

Affiliations: <sup>1</sup>Max Planck Institute for Evolutionary Anthropology, Department of Linguistic and Cultural Evolution, Leipzig, Germany

<sup>2</sup>Czech Academy of Sciences, Institute of Archaeology, Prague, Czechia

Contact: [hrncir.vaclav@gmail.com](mailto:hrncir.vaclav@gmail.com)

Journal: Human Nature

**Table S1** Artistic reconstructions of Pleistocene life published between 1800 and 1950. Only depictions of prehistoric people with weapons/tools included.

| Year | Title                                                                                                                                                | Species (based on fossils from site / period)                                              | Artist                                        | Scientist /Author  | Original publication                                                      | Reprinted in                                                   | Weapons/Tools                                               |
|------|------------------------------------------------------------------------------------------------------------------------------------------------------|--------------------------------------------------------------------------------------------|-----------------------------------------------|--------------------|---------------------------------------------------------------------------|----------------------------------------------------------------|-------------------------------------------------------------|
| 1838 | L'Homme Fossile<br>( <i>Fossil Man</i> )                                                                                                             | <i>unspecified pre-sapient</i> (partly inspired by fossils from Schmerling Caves, Belgium) | Johann C. Susemihl                            | Pierre Boitard     | Magasin Universel (April 1838)                                            | Rudwick 2008: 420                                              | Stone axe                                                   |
| 1846 | Homo Hercules Columarum<br>( <i>Pillars of Hercules Man</i> )                                                                                        | today <i>H. neanderthalensis</i> (Forbes' Quarry, Gibraltar)                               | Thomas H. Huxley                              | Thomas H. Huxley   | <i>unpublished sketch</i>                                                 | Ruddick 2009: 32                                               | Stone axe                                                   |
| 1851 | Periode der Jetztwelt<br>( <i>The Period of the Present World</i> )                                                                                  | <i>H. sapiens</i> (Adam and Eve)                                                           | Joseph Kuwasseg                               | Franz Unger        | <i>Die Urwelt in ihren verschiedenen Bildungsperioden</i> (1847, pl. XIV) | Moser 1998: 118                                                | <b>Stick or wooden club (?)</b>                             |
| 1861 | L'Homme Fossile<br>( <i>Fossil Man</i> )                                                                                                             | <i>unspecified pre-sapient</i> (partly inspired by fossils from Schmerling Caves, Belgium) | Pierre Boitard (engraved by Gustave Moreau)   | Pierre Boitard     | Paris Avant Les Hommes (1861, cover)                                      | Moser 1998: 135<br>Pettit & White 2011: 27<br>Ruddick 2009: 19 | Stone axe                                                   |
|      | Période Anthropique: Dernier Age Paléontologique – Apparition de L'Homme<br>( <i>Anthropic Period; Last Paleontological Age: Appearance of Man</i> ) | <i>unspecified – probably H. sapiens</i>                                                   | Pierre Boitard (engraved by Bisson & Cottard) | Pierre Boitard     | Paris Avant Les Hommes (1861, p. 239)                                     | Moser 1998: 137                                                | Stone axe, bow                                              |
| 1863 | Apparition de L'Homme<br>( <i>Appearance of Man</i> )                                                                                                | <i>H. sapiens</i> (Adam and Eve)                                                           | Edouard Riou                                  | Louis Figuier      | La Terre Avant le Deluge, 1st edition (1863, p. 363)                      | Moser 1998: 120<br>Pettit & White 2011: 28                     | <b>Stick (?)</b>                                            |
| 1866 | Apparition de L'Homme<br>( <i>Appearance of Man</i> )                                                                                                | <i>unspecified – probably H. sapiens</i>                                                   | Edouard Riou                                  | Louis Figuier      | La Terre Avant le Deluge, 5th edition (1866, p. 427)                      | Moser 1998: 123                                                | Stone axe                                                   |
| 1870 | Une famille à l'âge de pierre<br>( <i>A Family of the Stone Age</i> )                                                                                | <i>unspecified – probably H. sapiens</i>                                                   | Emile Bayard                                  | Louis Figuier      | L'Homme Primitif (1870, cover)                                            |                                                                | Stone axe, <b>wooden club (?)</b>                           |
|      | L'homme a l'epoque du grand ours et du mammoth<br>( <i>Man in the Great Bear and Mammoth Epoch</i> )                                                 | <i>unspecified – probably H. sapiens</i>                                                   | Emile Bayard                                  | Louis Figuier      | L'Homme Primitif (1870, p. 53)                                            | Moser 1998: 127                                                | Stone axe, <b>wooden club</b>                               |
| 1873 | The Neanderthal Man                                                                                                                                  | <i>H. neanderthalensis</i> (Neandertal valley, Germany)                                    | Ernest Griset                                 | ?                  | Harper's Weekly (July 1873)                                               | Moser 1998: 138<br>Sommer 2006: 225<br>Bermann 1999: 289       | Stone axe, stone-tipped spear                               |
| 1885 | La fuite devant le mammoth<br>( <i>Escaping from the Mammoth</i> )                                                                                   | <i>Unspecified (Magdalenian period)</i>                                                    | Paul Jamin                                    | ?                  | <i>oil on canvas</i> (Salon de 1885, Paris, France)                       | Capitan 1903: plate II                                         | Spear, stone mace, dagger (?)                               |
| 1886 | Les Premiers Ages de L'Humanite: Epoque de l'ours des Cavernes<br>( <i>The Early Ages of Humanity: Age of the Cave Bear</i> )                        | <i>unspecified – probably H. sapiens</i>                                                   | S. de Drée                                    | Camille Flammarion | Le Monde Avant la Création de L'Homme (1886, plate V)                     |                                                                | Stone axe (?), spear (?), <b>wooden club (?)</b> , rock (?) |
| 1887 | Un drame à l'âge de pierre<br>( <i>A drama in the Stone Age</i> )                                                                                    | <i>unspecified (Acheulean period)</i>                                                      | Paul Jamin                                    | ?                  | <i>oil on canvas</i> (Salon de 1885, Paris, France)                       | Capitan 1903: plate III                                        | Spear, stone axe                                            |
| 1887 | Ils disputaient leurs vies aux bêtes féroces<br>( <i>They risk their lives with ferocious beasts</i> )                                               | <i>unspecified – probably H. neanderthalensis or sapiens</i>                               | E. A. Tilly                                   | Henri du Cleuziou  | La Création de L'Homme et les Premiers Ages de Humanité (1887, p. 5)      | Moser 1998: 131                                                | Stone axe, stone-tipped spear                               |

|      |                                                                                                                     |                                                                           |                      |                      |                                                                             |                                            |                                         |
|------|---------------------------------------------------------------------------------------------------------------------|---------------------------------------------------------------------------|----------------------|----------------------|-----------------------------------------------------------------------------|--------------------------------------------|-----------------------------------------|
| 1887 | Le Dinornis oiseau contemporain de l'homme primitive ( <i>The Dinornis bird contemporary of the primitive man</i> ) | <i>unspecified – probably H. sapiens</i>                                  | ?                    | Henri du Cleuziou    | La Création de L'Homme et les Premiers Ages de Humanité (1887, p. 29)       |                                            | Sling or <b>throwing club (?)</b>       |
|      | L'homme de l'époque chelléenne ( <i>The Man of the Chellean Period</i> )                                            | <i>unspecified (Chellean period)</i>                                      | Georges Devy         | Henri du Cleuziou    | La Création de L'Homme et les Premiers Ages de Humanité (1887, p. 165)      |                                            | Stone axe, <b>wooden club (?)</b>       |
|      | L'homme vainqueur de l'ours des cavernes ( <i>Man the Conqueror of the Cave Bear</i> )                              | <i>unspecified (Mousterian period)</i>                                    | Georges Devy         | Henri du Cleuziou    | La Création de L'Homme et les Premiers Ages de Humanité (1887, p. 193)      | Moser 1998: 132                            | Stone dagger                            |
|      | Reconstitution de l'homme du Moustier (Reconstruction of the Moustier man)                                          | <i>unspecified (Mousterian period)</i>                                    | E. A. Tilly          | Henri du Cleuziou    | La Création de L'Homme et les Premiers Ages de Humanité (1887, p. 204)      |                                            | Stone dagger, spear, <b>wooden club</b> |
| 1894 | <i>without title</i>                                                                                                | <i>unspecified – probably H. sapiens</i>                                  | Worthington G. Smith | Worthington G. Smith | Man the Primeval Savage (1894, frontispiece)                                | Pettit & White 2011: 37<br>Moser 1998: xix | <b>Wooden club</b> , hand axe           |
| 1986 | An eviction scene at Wookey Hole, near Wells - Older Stone Age                                                      | <i>unspecified (tools from Wookey Hole, UK)</i>                           | Cecil Aldin          | Henry N. Hutchinson  | Prehistoric Man and Beast (1896, frontispiece)                              | Moser 1998: 141                            | Bone-tipped harpoon                     |
|      | Hunting the mammoth in southern France                                                                              | <i>unspecified (Older Stone Age)</i>                                      | Cecil Aldin          | Henry N. Hutchinson  | Prehistoric Man and Beast (1896, plate II)                                  | Moser 1998: 142                            | Harpoon or spear, rock                  |
|      | Hunting the reindeer in southern France                                                                             | <i>unspecified (Older Stone Age)</i>                                      | Cecil Aldin          | Henry N. Hutchinson  | Prehistoric Man and Beast (1896, plate III)                                 | Moser 1998: 142                            | Bone-tipped harpoon                     |
| 1905 | Pithecanthropus                                                                                                     | Pithecanthropus – today H. erectus (Java)                                 | Lancelot Speed       | Henry R. Knipe       | Nebula to Men (1905, facing p. 165)                                         | Moser 1998: 144                            | Branch/ <b>stick</b>                    |
|      | Early Palaeolithic Men                                                                                              | H. neanderthalensis                                                       | Ernest Bucknall      | Henry R. Knipe       | Nebula to Men (1905, facing p. 190)                                         | Moser 1998: 144                            | Hand axe                                |
|      | Cave Men (Hunter-Artists)                                                                                           | H. sapiens – Cro-Magnons                                                  | Ernest Bucknall      | Henry R. Knipe       | Nebula to Men (1905, facing p. 200)                                         | Moser 1998: 145                            | Stone-tipped spear                      |
| 1909 | An Ancestor: The Man of Twenty Thousand Years Age                                                                   | H. neanderthalensis (La Chapelle-aux-Saints, France)                      | František Kupka      | Marcellin Boule      | The Illustrated London News (February 1909), L'illustration (February 1909) | Sommer 2006: 227<br>Moser 1998: xxiii      | <b>Wooden or bone club (?)</b>          |
| 1910 | <i>without title</i>                                                                                                | <i>unspecified – H. Neanderthalensis (?)</i>                              | H. Hasbach           | Ludwig Wilser        | Leben und Heimat des Urmenschen (1910, cover)                               |                                            | Branch, boulder                         |
| 1911 | Snowbound (Neanderthals)                                                                                            | H. neanderthalensis (probably inspired by La Chapelle-aux-Saints, France) | Charles R. Knight    | ?                    | <i>oil on canvas</i>                                                        | Milner 2013<br>King 1949: frontispiece     | Stone-tipped spear                      |
| 1911 | Modern Man, the Mammoth-Slayer: The Briton of 170,000 Years Age                                                     | H. sapiens (Galley Hill, UK)                                              | Amédée Forestier     | Arthur Keith         | The Illustrated London News (March 1911)                                    | Sommer 2006:229<br>Moser 1998: 155         | Stone axe, stone-tipped spear           |
| 1911 | Not in the "Gorilla" Stage: The Man of 500,000 Years Ago                                                            | H. neanderthalensis (La Chapelle-aux-Saints, France)                      | Amédée Forestier     | Arthur Keith         | The Illustrated London News (May 1911)                                      | Sommer 2006:230<br>Moser 1998: xxiii       | Stone axe, stone-tipped spear           |
| 1912 | Homo Mousteriensis                                                                                                  | H. neanderthalensis (Le Moustier, France)                                 | Alice B. Woodward    | Henry R. Knipe       | Evolution in the Past (1912, facing p. 196)                                 |                                            | Hand axe, <b>stick</b> or bone          |

|      |                                                                                                                                                                                       |                                                                                  |                                   |                                   |                                                                                     |                                                    |                                                |
|------|---------------------------------------------------------------------------------------------------------------------------------------------------------------------------------------|----------------------------------------------------------------------------------|-----------------------------------|-----------------------------------|-------------------------------------------------------------------------------------|----------------------------------------------------|------------------------------------------------|
| 1915 | Neanderthal man at the station of Le Moustier, overlooking the valley of the Vézère, Dordogne                                                                                         | H. neanderthalensis (Le Moustier, France)                                        | Charles R. Knight                 | Henry F. Osborn                   | Men of the Old Stone Age (1915, frontispiece)                                       | Moser 1998: xxiv                                   | <b>Wooden club</b> , rock                      |
| 1920 | The Neanderthal Flint Workers                                                                                                                                                         | H. neanderthalensis (Le Moustier, France)                                        | Charles R. Knight                 | Henry F. Osborn                   | <i>oil on canvas</i> in American Museum of Natural History (New York)               | Osborn 1923: 11, Moser 1998: 158, Sommer 2010: 472 | Hand axe, stone-tipped spear                   |
|      | Cro-Magnon Artists Painting the Mammoth                                                                                                                                               | H. sapiens – Cro-Magnons (Font-de-Gaume, France)                                 | Charles R. Knight                 | Henry F. Osborn                   | <i>oil on canvas</i> in American Museum of Natural History (New York)               | Osborn 1923: 14, Moser 1998: 159, Sommer 2010: 473 | Wooden staff with baton de commandement        |
| 1921 | Mousterian Cave-dwellers                                                                                                                                                              | H. neanderthalensis (Le Moustier, France)                                        | Marjorie & Charles H. B. Quennell | Marjorie & Charles H. B. Quennell | Everyday life in Prehistoric Times (1921, p. 48)                                    |                                                    | Spear, hand-axe                                |
|      | Poise of the Mousterian Figure                                                                                                                                                        | H. neanderthalensis (La Chapelle-aux-Saints, France; Neandertal valley, Germany) | Marjorie & Charles H. B. Quennell | Marjorie & Charles H. B. Quennell | Everyday life in Prehistoric Times (1921, p.51)                                     |                                                    | Stone-tipped spear                             |
|      | Mousterians on the March                                                                                                                                                              | H. neanderthalensis (La Chapelle-aux-Saints, France; Neandertal valley, Germany) | Marjorie & Charles H. B. Quennell | Marjorie & Charles H. B. Quennell | Everyday life in Prehistoric Times (1921, p. 52)                                    |                                                    | Spear, hand-axe, <b>wooden club (?)</b>        |
|      | Types of Huts suggested by Aurignacian drawings                                                                                                                                       | H. sapiens – Cro-Magnons                                                         | Marjorie & Charles H. B. Quennell | Marjorie & Charles H. B. Quennell | Everyday life in Prehistoric Times (1921, p. 70)                                    |                                                    | Stone-tipped spear                             |
| 1922 | Restoration by A. Forestier of the Rhodesian Man whose Skull was Discovered in 1921                                                                                                   | H. rhodesiensis or heidelbergensis (Broken Hill, Zambia)                         | Amédée Forestier                  | J. Arthur Thompson (?)            | The Outline of Science, Vol. 1 (of 4). A Plain Story Simply Told (1922, p. 176-177) |                                                    | Wooden spear, rock or hand-axe                 |
| 1922 | The Earliest Man Tracked by a Tooth: An “Astounding Discovery” of Human Remains in Pliocene Strata                                                                                    | <i>Fictitious Hesperopithecus</i> (Upper Snake Creek, USA)                       | Amédée Forestier                  | Grafton E. Smith                  | The Illustrated London News (June 1922)                                             |                                                    | <b>Stick</b> or bone, hand-axe                 |
| 1925 | ?                                                                                                                                                                                     | H. neanderthalensis (Ghar Dalam, Malta)                                          | Amédée Forestier                  | Arthur Keith                      | The Illustrated London News (February 1925)                                         | Weltersbach 2007: 63                               | <b>Stick</b> , bone, <b>wooden club</b> , rock |
|      | Reconstructed: Australopithecus and the Rhodesian Man                                                                                                                                 | H. rhodesiensis (Broken Hill, Zambia)                                            | Amédée Forestier                  | Grafton E. Smith                  | The Illustrated London News (February 1925)                                         | Moser 1996: 191                                    | <b>Stick</b>                                   |
| 1929 | Restoration of a Neanderthal Family                                                                                                                                                   | H. neanderthalensis (Le Moustier, France)                                        | Frederick Blaschke                | Henry Field                       | <i>diorama</i> in Field Museum of Natural History (Chicago)                         | Farrington and Field 1929: frontispiece            | Hand axe, stone scraper                        |
| 1933 | Chellean Scene in Northern Europe about 250,000 Years Ago                                                                                                                             | <i>unspecified</i> ( <i>Chellean period</i> )                                    | Frederick Blaschke                | Henry Field                       | <i>diorama</i> in Field Museum of Natural History (Chicago)                         | Field 1933: plate 1                                | Hand axe                                       |
|      | Neanderthal Family at Devil’s Tower Rock-shelter, Gibraltar                                                                                                                           | H. neanderthalensis (Devil’s Tower Cave, Gibraltar)                              | Frederick Blaschke                | Henry Field                       | <i>diorama</i> in Field Museum of Natural History (Chicago)                         | Field 1933: plate 2                                | <b>Wooden club</b>                             |
| 1937 | Urmenschen auf der Höhlenbärenjagd (Zeit des Neandertalers, letzte Zwischeneiszeit) <i>Prehistoric men on the cave bear hunt (time of the Neanderthals, last interglacial period)</i> | H. neanderthalensis                                                              | Franz Roubal                      | ?                                 | <i>school mural</i>                                                                 |                                                    | Spear, <b>wooden club</b> , hand-axe           |

|      |                                                                                |                                                |                   |                   |                                              |                                                |                                                |
|------|--------------------------------------------------------------------------------|------------------------------------------------|-------------------|-------------------|----------------------------------------------|------------------------------------------------|------------------------------------------------|
| 1942 | With Flint-tipped Spear, Stone Ax, and Rocks, Neanderthal Man Repel an Invader | H. neanderthalensis                            | Charles R. Knight | Charles R. Knight | National Geographic Magazine (February 1942) |                                                | Hand axe, stone-tipped spear, <b>bone club</b> |
| 1950 | Paranthropus and early Homo erectus                                            | Paranthropus, H. erectus                       | Maurice Wilson    | ?                 | Painting in Natural History Museum (London)  | Andrews & Stringer 1989: 37                    | <b>Stick</b>                                   |
|      | The Life of Homo erectus at Zhoukoudian, China                                 | H. erectus (Zhoukoudian, China)                | Maurice Wilson    | ?                 | Painting in Natural History Museum (London)  | Moser 1998: 161<br>Andrews & Stringer 1989: 39 | Hand axe                                       |
|      | Homo Neanderthalensis Hunting at Swanscombe                                    | H. neanderthalensis (Swanscombe, UK)           | Maurice Wilson    | ?                 | Painting in Natural History Museum (London)  | Andrews & Stringer 1989: 43                    | Wooden spear                                   |
|      | Homo neanderthalensis, Neanderthal Man                                         | H. neanderthalensis (Gorham's Cave, Gibraltar) | Maurice Wilson    | ?                 | Painting in Natural History Museum (London)  | Andrews & Stringer 1989: 45                    | Wooden spear, hand axe                         |
|      | Cro-Magnon Man                                                                 | H. sapiens – Cro-Magnons                       | Maurice Wilson    | ?                 | Painting in Natural History Museum (London)  | Andrews & Stringer 1989: 47                    | Wooden spear, spear-thrower?                   |

## References to Table S1

- Andrews, Peter, and Chris Stringer. 1989. *Human Evolution: An Illustrated Guide*. Cambridge: Cambridge University Press.
- Berman, Judith C. 1999. Bad Hair Days in the Paleolithic: Modern (Re)Constructions of the Cave Man. *American Anthropologist* 101 (2):288-304.
- Boitard, Pierre. 1861. *Paris Avant Les Hommes, L'Homme Fossile, Etc. Histoire Naturelle Du Globe Terrestre*. Paris: Passard.
- Capitan, Louis. 1903. Le peintre préhistorien Jamin. Son œuvre. *Revue de l'École d'anthropologie* XIII:311-316.
- Cleuziou, Henri du. 1887. *La création de l'homme et les premiers âges de l'humanité*. Paris: C. Marpon & C. Flammarion.
- Farrington, Oliver C., and Henry Field. 1929. *Neanderthal (Mousterian) Man, Geology Leaflet*. Chicago: Field Museum of Natural History.
- Field, Henry. 1933. *Prehistoric Man: Hall of the Stone Age of the Old World, Anthropology Leaflet*. Chicago: Field Museum of Natural History.
- Figuier, Louis. 1863. *La terre avant le déluge (1st edition)*. Paris: Libraire de L. Hachette.
- . 1866. *La terre avant le déluge (5th edition)*. Paris: Libraire de L. Hachette.
- . 1870. *L'Homme Primitif*. Paris: Libraire de L. Hachette.
- Flammarion, Camille. 1886. *Monde avant la création de l'homme*. Paris: C. Marpon & C. Flammarion.
- Hutchinson, Henry Neville. 1896. *Prehistoric Man and Beast*. London: Smith, Elder, and Co.
- Knight, Charles R. 1949. *Prehistoric Man: The Great Adventurer*. New York: Appleton-Century-Crofts.
- Knipe, Henry Robert. 1905. *Nebula to Man*. London: J. M. Dent.
- Milner, Richard. 2013. Charles R. Knight: The Artist Who Saw through Time. *Fine Art Connoisseur* 10 (2).
- Moser, Stephanie. 1996. Visual Representation in Archaeology: Depicting the Missing-Link in Human Origins. In *Picturing Knowledge: Historical and Philosophical Problems Concerning the Use of Art in Science*. S. B. Brian, ed. Pp. 184-214. Toronto: University of Toronto Press.
- . 1998. *Ancestral Images: The Iconography of Human Origins*. Ithaca, New York: Cornell University Press.
- Osborn, Henry Fairfield. 1915. *Men of the Old Stone Age*. New York: Scribner.
- . 1923. *The Hall of the Age of Man*. New York: American Museum of Natural History.
- Pettitt, Paul B., and Mark J. White. 2011. Cave men: Stone tools, Victorian science, and the 'primitive mind' of deep time. *Notes and Records of the Royal Society* 65 (1):25-42.
- Quennell, Marjorie, and Charles H. B. Quennell. 1921. *Everyday Life in Prehistoric Times*. London: Batsford.
- Ruddick, Nicholas. 2009. *Fire in the Stone: Prehistoric Fiction from Charles Darwin to Jean M. Auel*. Middletown, CT: Wesleyan University Press.
- Rudwick, Martin J. S. 2008. *Worlds Before Adam: The Reconstruction of Geohistory in the Age of Reform*. Chicago and London: The University of Chicago Press.
- Smith, Worthington G. 1894. *Man, the Primeval Savage*. London: Edward Stanford.
- Sommer, Marianne. 2006. Mirror, Mirror on the Wall: Neanderthal as Image and 'Distortion' in Early 20th-Century French Science and Press. *Social Studies of Science* 36 (2):207-240.
- . 2010. Seriality in the Making: The Osborn-Knight Restorations of Evolutionary History. *History of Science* 48 (3-4):461-482.
- Thomson, J. Arthur. 1922. *The Outline of Science, Vol. 1 (of 4) - A Plain Story Simply Told*. London: Waverley.
- Unger, Franz. 1847. *Die Urwelt in ihren verschiedenen Bildungsperioden: XIV landschaftliche Darstellungen*. Munich: S. Minsinger and A. Geisberger.
- Weltersbach, Konstanze. 2007. Homo neanderthalensis und Urmensch: Rekonstruktionen und Lebensbilder. In *Physische Anthropologie – Biologie des Menschen*. M. Kaasch, J. Kaasch and N. A. Rupke, eds. Pp. 55-69. Berlin: VWB-Verlag.

**Table S2** The use of close-range clubs/sticks according to activity and frequency of use. All analyzed societies (n = 57).

| Contact club usage                            | Violence<br>C / B | Land animal hunting<br>C / B | Bird hunting<br>C / B | Marine hunting<br>C | Fishing<br>C |
|-----------------------------------------------|-------------------|------------------------------|-----------------------|---------------------|--------------|
| Primary                                       | 16 / 3            | - / 1                        | 2 / -                 | 2                   | -            |
| Primary?                                      | 10 / 1            | 2 / -                        | 1 / 1                 | 3                   | 1            |
| Secondary                                     | 15 / 1            | 22 / 2                       | 9 / 1                 | 9                   | 21           |
| ? (uncertain)                                 | 1 / -             | 1 / -                        | 1 / -                 | -                   | -            |
| <i>Only non-wooden<br/>or composite clubs</i> | 3 / -             | -                            | -                     | -                   | 1            |
| No evidence                                   | 7                 | 29                           | 42                    | 43                  | 34           |

Note. C = clubs/sticks used only as contact weapons at close-range. B = both contact clubs and throwing sticks are used for the activity and/or the same clubs/sticks used both as contact and projectile weapons.

**Table S3** The use of throwing sticks/clubs according to activity and frequency of use. All analyzed societies (n = 57).

| Throwing stick usage                    | Violence<br>P / B | Land animal hunting<br>P / B | Bird hunting<br>P / B |
|-----------------------------------------|-------------------|------------------------------|-----------------------|
| Primary                                 | - / 3             | - / 1                        | 1 / -                 |
| Primary?                                | - / 1             | 1 / -                        | 2 / 2                 |
| Secondary                               | - / 1             | 1 / 2                        | 2 / -                 |
| ? (uncertain)                           | - / 5             | -                            | -                     |
| <i>Only non-wooden<br/>or composite</i> | - / 2             | -                            | -                     |
| No evidence                             | 45                | 52                           | 50                    |

Note. P = clubs/sticks used only as projectile weapons at long-range. B = both contact clubs and throwing sticks are used for the activity or the same clubs/sticks used both as contact and projectile weapons.

**Table S4** The use of close-range clubs/sticks according to activity and frequency of use. Only hunter-gatherer societies (n = 39).

| Contact club usage                            | Violence<br>C / B | Land animal hunting<br>C / B | Bird hunting<br>C / B | Marine hunting<br>C | Fishing<br>C |
|-----------------------------------------------|-------------------|------------------------------|-----------------------|---------------------|--------------|
| Primary                                       | 11 / 1            | - / 1                        | 2 / -                 | 2                   | -            |
| Primary?                                      | 7 / 1             | 2 / -                        | 1 / 1                 | 3                   | 1            |
| Secondary                                     | 11 / 1            | 16 / 2                       | 6 / 1                 | 7                   | 16           |
| ? (uncertain)                                 | -                 | 1 / -                        | 1 / -                 | -                   | -            |
| <i>Only non-wooden or<br/>composite clubs</i> | 2 / -             | -                            | -                     | -                   | -            |
| No evidence                                   | 5                 | 17                           | 27                    | 27                  | 22           |

Note. C = clubs/sticks used only as contact weapons at close-range. B = both contact clubs and throwing sticks are used for the activity and/or the same clubs/sticks used both as contact and projectile weapons.

**Table S5** The use of close-range clubs/sticks according to activity and frequency of use. Only primarily hunter-gatherer societies (n = 18).

| Contact club usage                        | Violence<br>C / B | Land animal hunting<br>C / B | Bird hunting<br>C / B | Marine hunting<br>C | Fishing<br>C |
|-------------------------------------------|-------------------|------------------------------|-----------------------|---------------------|--------------|
| Primary                                   | 5 / 2             | -                            | -                     | -                   | -            |
| Primary?                                  | 3 / -             | -                            | -                     | -                   | -            |
| Secondary                                 | 4 / -             | 6 / -                        | 3 / -                 | 2                   | 5            |
| ? (uncertain)                             | 1 / -             | -                            | -                     | -                   | -            |
| <i>Only non-wooden or composite clubs</i> | 1 / -             | -                            | -                     | -                   | 1            |
| No evidence                               | 2                 | 12                           | 15                    | 16                  | 12           |

Note. C = clubs/sticks used only as contact weapons at close-range. B = both contact clubs and throwing sticks are used for the activity and/or the same clubs/sticks used both as contact and projectile weapons.

**Table S6** The use of throwing sticks/clubs according to activity and frequency of use. Only hunter-gatherer societies (n = 39).

| Throwing stick usage                | Violence<br>P / B | Land animal hunting<br>P / B | Bird hunting<br>P / B |
|-------------------------------------|-------------------|------------------------------|-----------------------|
| Primary                             | - / 2             | - / 1                        | 1 / -                 |
| Primary?                            | -                 | 1 / -                        | 1 / 2                 |
| Secondary                           | - / 1             | 1 / 2                        | 1 / -                 |
| ? (uncertain)                       | - / 3             | -                            | -                     |
| <i>Only non-wooden or composite</i> | -                 | -                            | -                     |
| No evidence                         | 33                | 34                           | 34                    |

Note. P = clubs/sticks used only as projectile weapons at long-range. B = both contact clubs and throwing sticks are used for the activity or the same clubs/sticks used both as contact and projectile weapons.

**Table S7** The use of throwing sticks/clubs according to activity and frequency of use. Only primarily hunter-gatherer societies (n = 18).

| Throwing stick usage                | Violence<br>P / B | Land animal hunting<br>P / B | Bird hunting<br>P / B |
|-------------------------------------|-------------------|------------------------------|-----------------------|
| Primary                             | - / 1             | -                            | -                     |
| Primary?                            | - / 1             | -                            | 1 / -                 |
| Secondary                           | -                 | -                            | 1 / -                 |
| ? (uncertain)                       | - / 2             | -                            | -                     |
| <i>Only non-wooden or composite</i> | - / 2             | -                            | -                     |
| No evidence                         | 12                | 18                           | 16                    |

Note. P = clubs/sticks used only as projectile weapons at long-range. B = both contact clubs and throwing sticks are used for the activity or the same clubs/sticks used both as contact and projectile weapons.



**Table S8** The use of close-range clubs (C) and throwing sticks (P) according to type of hunting and whether they were used for hunting/catching animals or only for finishing animals already caught. All analyzed societies (n = 57).

| <b>Contact club and throwing stick usage</b> | <b>Land animal hunting<br/>C / P</b> | <b>Bird hunting<br/>C / P</b> | <b>Marine hunting<br/>C</b> | <b>Fishing<br/>C</b> |
|----------------------------------------------|--------------------------------------|-------------------------------|-----------------------------|----------------------|
| Hunting (or HF)                              | 21 / 5                               | 9 / 7                         | 9                           | 7                    |
| ? (uncertain)                                | 5 / -                                | 1 / -                         | 2                           | 1                    |
| Only finishing                               | 2 / -                                | 5 / -                         | 3                           | 14                   |
| <i>Only on-wooden or composite</i>           | -                                    | -                             | -                           | 1                    |
| No evidence                                  | 29 / 52                              | 42 / 50                       | 43                          | 34                   |

Note. HF = hunting and finishing.

**Table S9** Hunting techniques and delivery methods associated with clubs/sticks as recorded for each society. Divided by type of hunting.

| <b>Society</b>        | <b>Land animal hunting</b>                                                                   | <b>Bird hunting</b>                                                  | <b>Marine Hunting</b>                                  |
|-----------------------|----------------------------------------------------------------------------------------------|----------------------------------------------------------------------|--------------------------------------------------------|
| San                   | Approach (clubbing)<br>Pursuit (clubbing)<br>Encounter (clubbing, throwing)                  | Approach (clubbing, throwing)<br>Encounter (throwing)                |                                                        |
| Hadza                 | ? (clubbing)                                                                                 |                                                                      |                                                        |
| Tiwi                  | Ambush (throwing)<br>Approach (throwing)<br>Pursuit (clubbing)<br>Encounter (clubbing)       | Ambush (throwing)                                                    |                                                        |
| Aranda                | ? (throwing)                                                                                 | ? (throwing)                                                         |                                                        |
| Mbau Fijians          |                                                                                              | ? (throwing)                                                         |                                                        |
| Ainu                  | Disadvantage (clubbing)                                                                      |                                                                      | ? (clubbing)                                           |
| Nivkh                 | ? (clubbing)                                                                                 | ? (clubbing)                                                         | Disadvantage (clubbing)<br>Approach (clubbing)         |
| Yukaghir              | Pursuit (clubbing)                                                                           |                                                                      |                                                        |
| Ingalik               | Ambush/Advantage (clubbing)<br>Pursuit (clubbing)                                            |                                                                      |                                                        |
| Aleut                 |                                                                                              |                                                                      | Approach (clubbing)<br>Disadvantage/Pursuit (clubbing) |
| Innu                  | Disadvantage (clubbing)<br>Encounter (clubbing)                                              |                                                                      | Approach (clubbing)<br>Ambush? (clubbing)              |
| Mi'kmaq               | Ambush (clubbing)                                                                            | Disadvantage (clubbing)                                              | Approach (clubbing)                                    |
| Ojibwa                | Disadvantage (clubbing)                                                                      | Ambush? (clubbing)<br>Pursuit (clubbing)                             |                                                        |
| Slavey                | ? (clubbing)                                                                                 |                                                                      |                                                        |
| Kaska                 | Ambush (clubbing)                                                                            |                                                                      |                                                        |
| Eyak                  |                                                                                              | Disadvantage (clubbing)                                              | ? (clubbing)                                           |
| Nuxalk                | Encounter? (clubbing)                                                                        |                                                                      | Approach (clubbing)                                    |
| Southern Coast Salish | Disadvantage (clubbing)                                                                      |                                                                      | Approach (clubbing)                                    |
| Yurok                 | Encounter (throwing)                                                                         | Encounter (throwing)                                                 | ? (clubbing)                                           |
| Pomo                  | Pursuit (clubbing)<br>Encounter? (clubbing)                                                  |                                                                      | Approach/Pursuit (clubbing)                            |
| Yokuts                | Pursuit/Disadvantage (throwing, clubbing)                                                    |                                                                      |                                                        |
| Northern Paiute       | Disadvantage? (clubbing)                                                                     | Disadvantage (clubbing)<br>Approach (clubbing)                       |                                                        |
| Eastern Apache        | Disadvantage (clubbing)                                                                      | Encounter (clubbing)                                                 |                                                        |
| Warao                 | Disadvantage (clubbing)<br>Pursuit (clubbing)                                                |                                                                      |                                                        |
| Sirionó               | Ambush (clubbing)<br>Pursuit (clubbing)<br>Encounter (clubbing)<br>Approach? (clubbing)      |                                                                      |                                                        |
| Nambicuara            | Encounter (clubbing)                                                                         |                                                                      |                                                        |
| Canela                | Disadvantage (clubbing)<br>Pursuit (clubbing)<br>Encounter (clubbing)<br>Approach (clubbing) |                                                                      |                                                        |
| Tupinamba             | Disadvantage (clubbing)<br>Encounter? (clubbing)                                             |                                                                      |                                                        |
| Xavante               | Disadvantage (clubbing)                                                                      | Encounter (throwing)                                                 |                                                        |
| Xokleng               | Disadvantage (clubbing)<br>Ambush (clubbing)                                                 |                                                                      |                                                        |
| Enxet and Enlhet      |                                                                                              | Disadvantage (clubbing)<br>Approach (clubbing)<br>Ambush (throwing)  |                                                        |
| Yahgan                |                                                                                              | Disadvantage (clubbing)<br>Approach (clubbing)<br>Pursuit (clubbing) | Approach (clubbing)                                    |

**Fig. S1** Close-range clubs (red triangles) and/or throwing sticks (large circles) used in violence. Societies with no or ambiguous evidence marked with small circles.

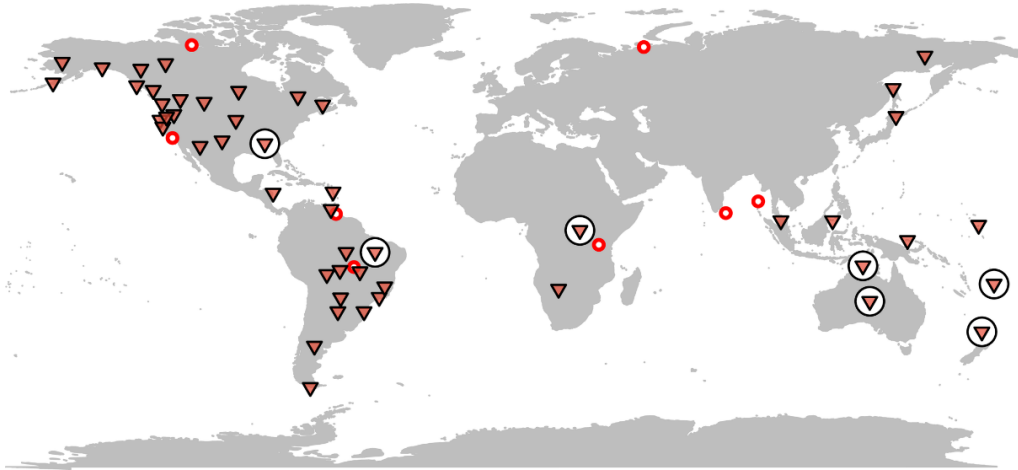

**Fig. S2** Close-range clubs (orange triangles) and/or throwing sticks (green squares) used in land animal hunting. Societies with no or ambiguous evidence marked with red circles.

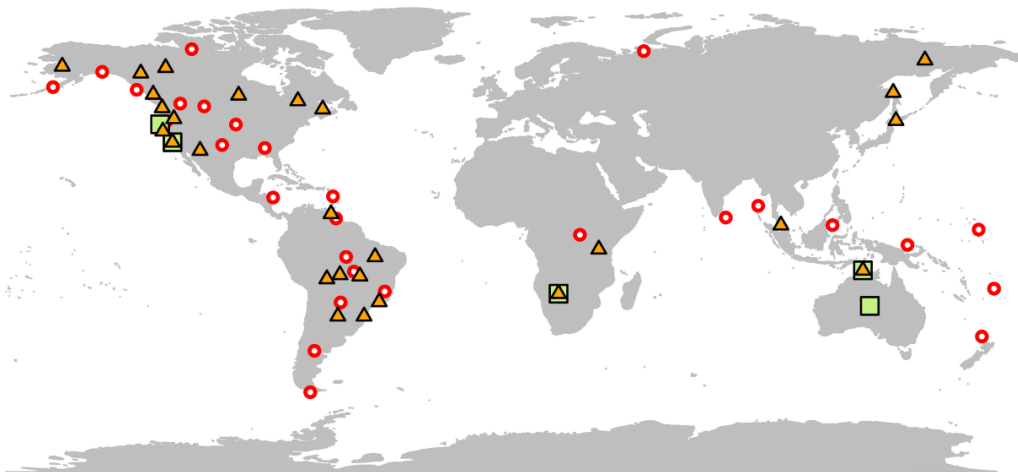

**Fig. S3** Close-range clubs (orange triangles) and/or throwing sticks (green squares) used in bird hunting. Societies with no or ambiguous evidence marked with red circles.

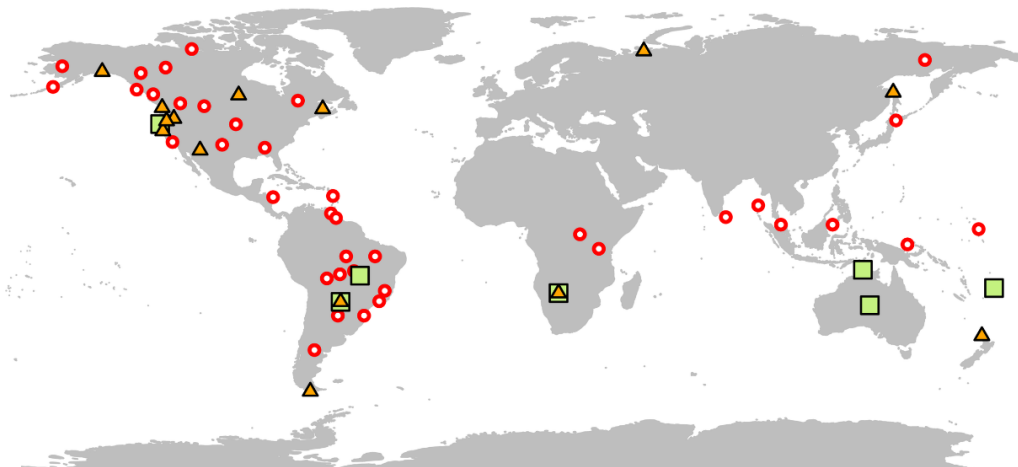

**Fig. S4** Close-range clubs (orange triangles) used in marine hunting. Societies with no or ambiguous evidence marked with red circles.

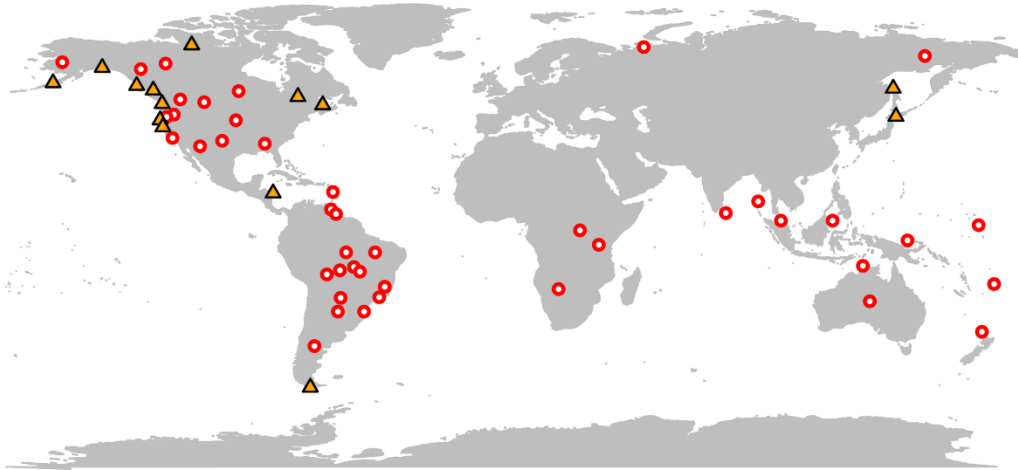

**Fig. S5** Close-range clubs (orange triangles) used in fishing. Societies with no or ambiguous evidence marked with red circles.

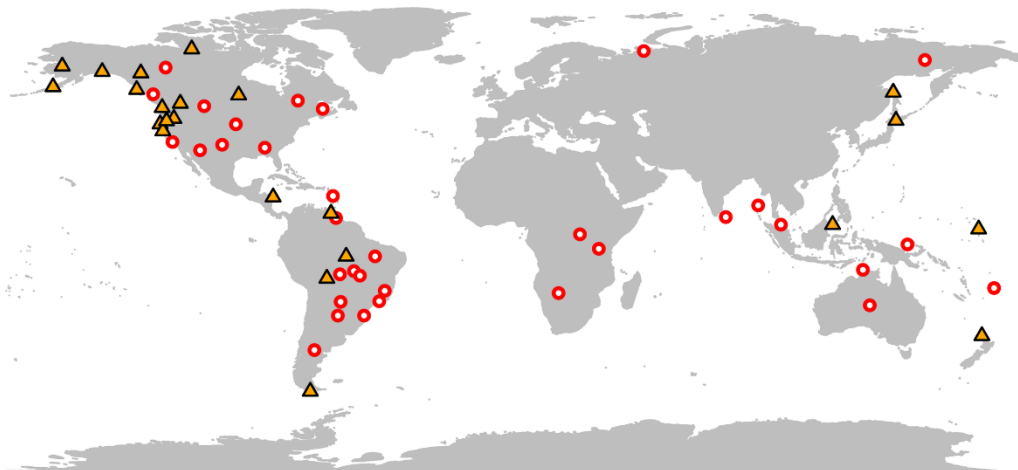

Supplement: 12110_2023_9445_MOESM1_ESM.pdf [file 12110_2023_9445_MOESM1_ESM.pdf]
